# Supplementary material
Source: MDPI journal article supplement (https://www.mdpi.com/2073-445X/11/8/1128)
Supplement: s1 [file s1]

Supplemental Materials

# Green Space for Mental Health in the COVID-19 Era: A Pathway Analysis in Residential Green Space Users

**Table 1.** The goodness of fit of tested models.

| Model      | Estimator | SRMR | CFI  | TLI  | RMSEA | AIC    | BIC    |
|------------|-----------|------|------|------|-------|--------|--------|
| M0         | ADF/WLS   | 0.03 | 0.96 | 0.89 | 0.04  | 143.53 | 377.49 |
| M1 (final) | ADF/WLS   | 0.04 | 0.96 | 0.90 | 0.04  | 122.08 | 307.30 |
| M1 (final) | ML        | 0.04 | 0.98 | 0.96 | 0.05  | 134.15 | 319.37 |
| M1 (final) | GLS       | 0.04 | 0.95 | 0.88 | 0.05  | 130.56 | 315.78 |
| M2         | ADF/WLS   | 0.04 | 0.96 | 0.90 | 0.04  | 122.12 | 307.34 |
| M3         | ADF/WLS   | 0.04 | 0.96 | 0.89 | 0.04  | 124.08 | 314.17 |

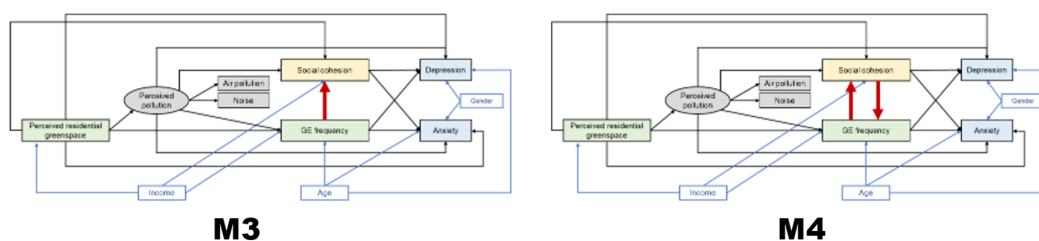

**Figure 1.** Competing models.
